# Supplementary material for: Zeolite materials with Ni and Co: synthesis and catalytic potential in the selective hydrogenation of citral
Source: publisher site journal article supplement (doi:10.3762/bjnano.16.40), 2025-04-14
Supplement: Additional file 1 [file 2190-4286-16-40-S1.pdf]

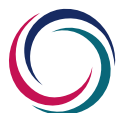

## Supporting Information

for

### **Zeolite materials with Ni and Co: synthesis and catalytic potential in the selective hydrogenation of citral**

Inocente Rodríguez-Iznaga, Yailen Costa Marrero, Tania Farias Piñeira, Céline Fontaine, Lexane Paget, Beatriz Concepción Rosabal, Arbelio Penton Madrigal, Vitalii Petranovskii and Gwendoline Lafaye

*Beilstein J. Nanotechnol.* **2025**, *16*, 520–529. doi:10.3762/bjnano.16.40

## Additional figures

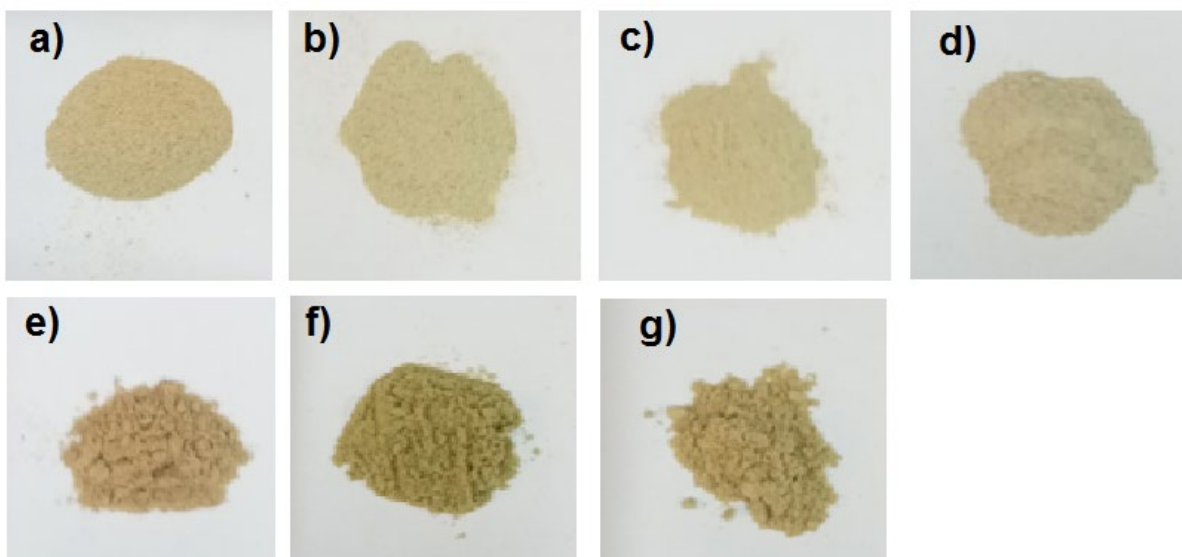

**Figure S1:** Photographs of samples of starting zeolite mineral (ZSA) and materials obtained through IE and Imp showing their color differences before and after treatments. (a)  $\text{CoZ}_{\text{IE}}$ , (b)  $\text{NiZ}_{\text{IE}}$ , (c)  $\text{CoNiZ}_{\text{IE}}$ , (d) ZSA, (e)  $\text{CoZ}_{\text{Imp}}$ , (f)  $\text{NiZ}_{\text{Imp}}$ , and (g)  $\text{CoNiZ}_{\text{Imp}}$ .

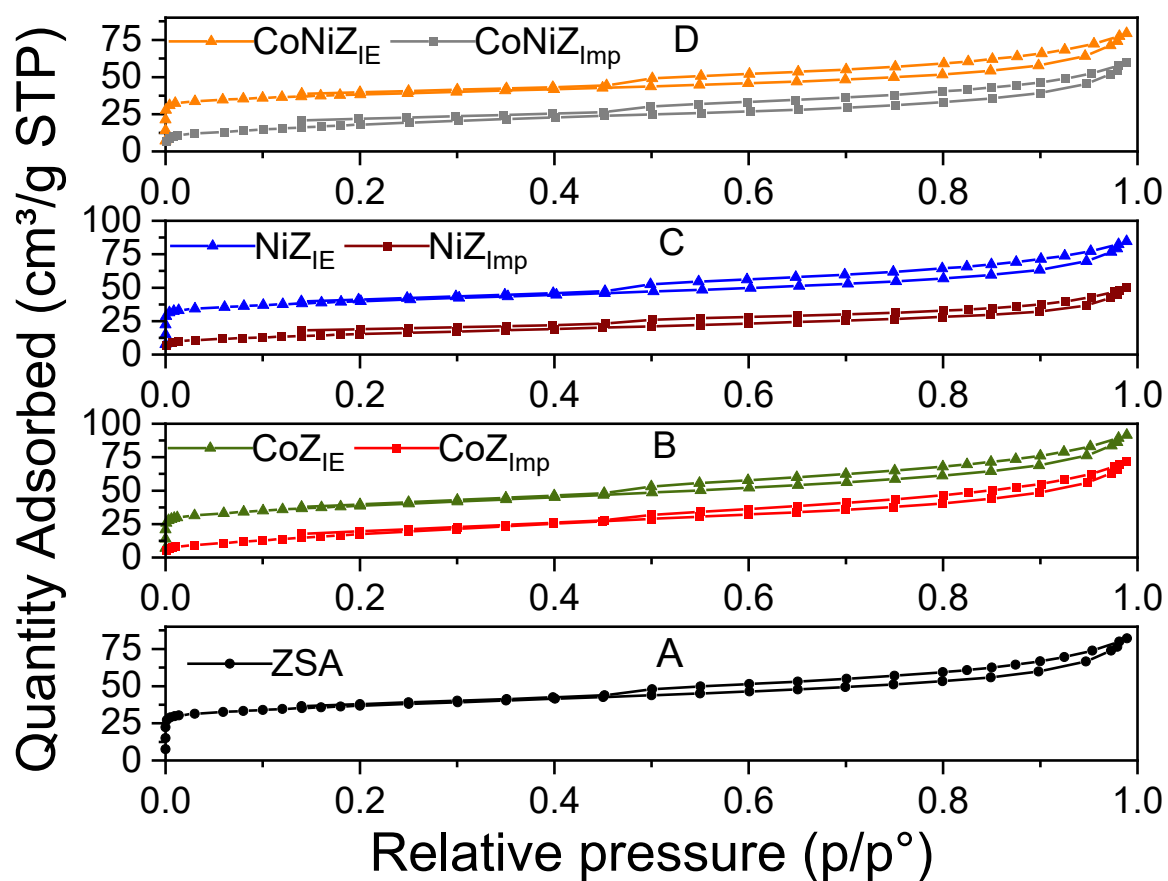

**Figure S2:** Adsorption isotherms of  $N_2$  at 77 K for the starting zeolite mineral (A) and (B–D) materials obtained through IE and Imp.
